# Supplementary material for: Efficiency of novel nanocombinations of bovine milk proteins (lactoperoxidase and lactoferrin) for combating different human cancer cell lines
Source: PubMed Central journal article supplement (PMC5711920; doi:10.1038/s41598-017-16962-6), 2017-12-01
Supplement: 41598_2017_16962_MOESM1_ESM.pdf [file 41598_2017_16962_MOESM1_ESM.pdf]

# Efficiency of novel nanocombinations of bovine milk proteins (lactoperoxidase and lactoferrin) for combating different human cancer cell lines

Marwa M. Abu-Serie<sup>1</sup> & Esmail M. El-Fakharany<sup>2</sup>

<sup>1</sup>Medical Biotechnology Department, Genetic Engineering and Biotechnology Research Institute, City for Scientific Research and Technology Applications (SRTA-City), New Borg EL-Arab 21934, Alexandria, Egypt.

<sup>2</sup>Protein Research Department, Genetic Engineering and Biotechnology Research Institute, City for Scientific Research and Technology Applications (SRTA-City), New Borg EL-Arab 21934, Alexandria, Egypt.

Correspondence and requests for materials should be addressed to M.M.A. (email: [marwaelhedaia@gmail.com](mailto:marwaelhedaia@gmail.com)) and E.M.E. (email: [esmailelfakharany@yahoo.co.uk](mailto:esmailelfakharany@yahoo.co.uk))

Table S1 IC<sub>50</sub> (μg/ml) and EC<sub>100</sub> (μg/ml) of all tested NPs samples against human normal cell line

| Sample                                        | Fibroblast       |                   |
|-----------------------------------------------|------------------|-------------------|
|                                               | IC <sub>50</sub> | EC <sub>100</sub> |
| Free chitosan NPs (unloaded and uncoated NPs) | 437.41±8.33      | 190.99±2.8        |
| LPO                                           | 829.8±27         | 332.4±15.1        |
| LPO-loaded NPs                                | 2557.2±12        | 1388±9.3          |
| LPO coated NPs                                | 1208.3±83        | 414.4±12.5        |
| LF                                            | 816.1±9.3        | 389.1±7.2         |
| LF-loaded NPs                                 | 1357±50.3        | 469.6±6.2         |
| LF coated NPs                                 | 2311.6±83.8      | 1244.7±14.4       |
| LPO+LF                                        | 900.8±11.4       | 315.9±3.4         |
| LPO+LF-loaded NPs                             | 3283.2±35.1      | 1374.7±7.8        |
| LPO+LF coated NPs                             | 1102.3±57.8      | 396.7±89.1        |
| LF coated LPO-loaded NPs                      | 2116.3±14        | 1145.1±4.5        |
| LPO coated LF-loaded NPs                      | 999.7±4          | 334.4±2.5         |
| 5-FU                                          | 1.9±0.14         | 0.79±0.17         |

All values were expressed as mean±SEM.

Table S2 Combination cytotoxic effect of LPO, LF and chitosan in the prepared NPs samples against human cancer cell lines in the term of CI values

| NPs samples              | CI values    |              |              |             |
|--------------------------|--------------|--------------|--------------|-------------|
|                          | Caco-2       | HepG-2       | MCF-7        | PC-3        |
| LPO-loaded NPs           | 0.946±0.003  | 0.804±0.002  | 0.942±0.0006 | 0.858±0.001 |
| LF-loaded NPs            | 0.843±0.001  | 0.861±0.0003 | 0.872±0.001  | 0.882±0.002 |
| LF coated NPs            | 0.888±0.001  | 0.795±0.003  | 0.893±0.002  | 0.897±0.002 |
| LPO+LF-loaded NPs        | 0.842±0.0001 | 0.748±0.001  | 0.836±0.0007 | 0.852±0.001 |
| LPO+LF coated NPs        | 1.354±0.014  | 1.128±0.026  | 1.27±0.018   | 1.297±0.001 |
| LPO coated LF-loaded NPs | 1.254±0.007  | 1.155±0.01   | 1.061±0.001  | 1.216±0.002 |
| LF coated LPO-loaded NPs | 0.826±0.0008 | 0.706±0.0007 | 0.845±0.0001 | 0.837±0.005 |
| LPO coated NPs           | 1.664±0.035  | 1.432±0.007  | 1.331±0.006  | 1.554±0.029 |

All values were expressed as mean±SEM.
